# Supplementary material
Source: PubMed Central journal article supplement (PMC1861256)
Supplement: heart_92_11_1701__1.pdf [file heart_92_11_1701__1.pdf]

## Childhood risk factors for adult cardiovascular disease and primary prevention in childhood

DS Celermajer, JGJ Ayer

Web only refs

1. McGill HC Jr, McMahan CA, Zieske AW, *et al.* Effects of non-lipid risk factors on atherosclerosis in youth with a favorable lipoprotein profile. *Circulation* 2001;**103**:1546–50.
2. Zieske AW, Tracy RP, McMahan CA, *et al.* Pathobiological Determinants of Atherosclerosis in Youth Research Group. Elevated serum C-reactive protein levels and advanced atherosclerosis in youth. *Arterioscler Thromb Vasc Biol* 2005;**25**:1237–43.
3. Cook DG, Mendall MA, Whincup PH, *et al.* C-reactive protein concentration in children: relationship to adiposity and other cardiovascular risk factors. *Atherosclerosis* 2000;**149**:139–50.
4. Hedley AA, Ogden CL, Johnson CL, *et al.* Prevalence of overweight and obesity among US children, adolescents, and adults, 1999–2002. *JAMA* 2004;**291**:2847–50.
5. Must A, Jacques PF, Dallal GE, *et al.* Long-term morbidity and mortality of overweight adolescents. A follow-up of the Harvard Growth Study of 1922 to 1935. *N Engl J Med* 1992;**327**:1350–5.
6. Mossberg HO. 40-year follow-up of overweight children. *Lancet* 1989;**2**:491–3.
7. Lawlor DA, Leon DA. Association of body mass index and obesity measured in early childhood with risk of coronary heart disease and stroke in middle age: findings from the Aberdeen children of the 1950s prospective cohort study. *Circulation* 2005;**111**:1891–6.
8. Sinaiko AR, Donahue RP, Jacobs DR Jr, *et al.* Relation of weight and rate of increase in weight during childhood and adolescence to body size, blood pressure, fasting insulin, and lipids in young adults: The Minneapolis Children’s Blood Pressure Study. *Circulation* 1999;**99**:1471–76.
9. Norman JE, Bild D, Lewis CE, *et al.* The impact of weight change on cardiovascular disease risk factors in young black and white adults: the CARDIA study. *International Journal of Obesity* 2003;**27**:369–76.
10. de Ferranti SD, Gauvreau K, Ludwig DS, *et al.* Prevalence of the metabolic syndrome in American adolescents: findings from the Third National Health and Nutrition Examination Survey. *Circulation* 2004;**110**:2494–7.
11. Kato M, Roberts-Thomson P, Phillips BG, *et al.* Impairment of endothelium-dependent vasodilation of resistance vessels in patients with obstructive sleep apnea. *Circulation* 2000;**102**:2607–10.
12. Larkin EK, Rosen CL, Kirchner L, *et al.* Variation of C- Reactive protein levels in adolescents: Association with sleep-disordered breathing and sleep duration. *Circulation* 2005;**111**:1978–84.
13. Amin RS, Kimball TR, Bean JA, *et al.* Left ventricular hypertrophy and abnormal ventricular geometry in children and adolescents with obstructive sleep apnea. *Am J Respir Crit Care Med* 2002;**165**:1395–9.
14. Shamsuzzaman AS, Winnicki M, Lanfranchi P, *et al.* Elevated C-reactive protein in patients with obstructive sleep apnea. *Circulation* 2002;**105**:2462–4.

15. Watts K, Beye P, Siafarkis A, *et al.* Exercise training normalizes vascular dysfunction and improves central adiposity in obese adolescents. *J Am Coll Cardiol* 2004;**3**:1823–7.
16. Balagopal P, George D, Patton N, *et al.* Lifestyle-only intervention attenuates the inflammatory state associated with obesity: a randomized controlled study in adolescents. *J Pediatr* 2005;**146**:342–8.
17. DuRant RH, Baranowski T, Rhodes T, *et al.* Association among serum lipid and lipoprotein concentrations and physical activity, physical fitness, and body composition in young children. *J Pediatr* 1993;**123**:185–92.
18. Clarkson P, Montgomery HE, Mullen MJ, *et al.* Exercise training enhances endothelial function in young men. *J Am Coll Cardiol* 1999;**33**:1379–85.
19. Liu K, Ruth KJ, Flack JM, *et al.* Blood pressure in young blacks and whites: relevance of obesity and lifestyle factors in determining differences. The CARDIA Study. Coronary Artery Risk Development in Young Adults. *Circulation* 1996;**93**:60–6.
20. Anonymous. From the Centers for Disease Control and Prevention. Trends in cigarette smoking among high school students—United States, 1991–2001. *JAMA* 2002;**288**:308–9.
21. Glantz SA, Parmley WW. Passive smoking and heart disease: Epidemiology, physiology, and biochemistry. *Circulation* 1991;**83**:1–12.
22. Emmons KM, Hammond SK, Fava JL, *et al.* A randomized trial to reduce passive smoke exposure in low-income households with young children. *Pediatrics* 2001;**108**:18–24.
23. Weitzman M, Cook S, Auinger P, *et al.* Tobacco smoke exposure is associated with the metabolic syndrome in adolescents. *Circulation* 2005;**112**:862–9.
24. Raitakari OT, Adams MR, McCredie RJ, *et al.* Arterial endothelial dysfunction related to passive smoking is potentially reversible in healthy young adults. *Ann Intern Med* 1999;**130**:578–81.
25. Moskowitz WB, Mosteller M, Schieken RM, *et al.* Lipoprotein and oxygen transport alterations in passive smoking preadolescent children. The MCV Twin Study. *Circulation* 1990;**81**:586–92.
26. Knoflach M, Kiechl S, Kind M, *et al.* Cardiovascular risk factors and atherosclerosis in young males: ARMY study (Atherosclerosis Risk-Factors in Male Youngsters). *Circulation* 2003;**108**:1064–9.
27. Palinski W, D'Armiento PD, Witztum JL, *et al.* Maternal hypercholesterolaemia and treatment during pregnancy influence the long-term progression of atherosclerosis in offspring of rabbits. *Circ Res* 2001;**89**:991–96.
28. Napoli C, de Nigris F, Welch JS, *et al.* Maternal hypercholesterolaemia during pregnancy promotes early atherogenesis in LDL receptor—deficient mice and alters aortic gene expression determined by microarray. *Circulation* 2002;**105**:1360–7.
29. Leeson CP, Whincup PH, Cook DG, *et al.* Flow-mediated dilation in 9- to 11-year-old children: the influence of intrauterine and childhood factors. *Circulation* 1997;**96**:2233–8.
30. Weigman A, de Groot E, Hutten BA, *et al.* Arterial intima-media thickness in children heterozygous for familial hypercholesterolaemia. *Lancet* 2004;**363**:369–70.

31. Clarkson P, Celermajer DS, Donald AE. Impaired vascular reactivity in insulin-dependent diabetes mellitus is related to disease duration and low density lipoprotein cholesterol levels. *J Am Coll Cardiol* 1996;**28**:573–9.
32. Paradis G, Lambert M, O’Loughlin J, *et al.* Blood pressure and adiposity in children and adolescents. *Circulation* 2004;**110**:1832–38.
33. Appel LJ, Moore TJ, Obarzanek E, *et al.* A clinical trial of the effects of dietary patterns on blood pressure. *N Engl J Med* 1997;**336**:1117–24.
34. Sacks FM, Svetkey LP, Vollmer WM, *et al.* Effects on blood pressure of reduced dietary sodium and the dietary approaches to stop hypertension (DASH) diet. *N Engl J Med* 2001;**344**:3–10.
35. Clarkson P, Celermajer DS, Powe AJ *et al.* Endothelium-dependent dilatation is impaired in young healthy subjects with a family history of premature coronary disease. *Circulation* 1997;**96**:3378–83.
36. Wang TJ, Nam BH, D’Agostino RB, *et al.* Carotid intima-media thickness is associated with premature parental coronary heart disease: the Framingham Heart Study. *Circulation* 2003;**108**:572–6.
37. Cuomo S, Guarini P, Gaeta G, *et al.* Increased carotid intima-media thickness in children-adolescents, and young adults with a parental history of premature myocardial infarction. *Eur Heart J* 2002;**23**:1345–50.
38. Gaeta G, De Michele M, Cuomo S, *et al.* Arterial abnormalities in the offspring of patients with premature myocardial infarction. *N Engl J Med* 2000;**343**:840–6.
39. de Divitiis M, Pilla CM, Kattenhorn M, *et al.* Vascular dysfunction after repair of coarctation of the aorta: impact of early surgery. *Circulation* 2001;**104**(12 Suppl 1):I165–70.
40. Barker DJ, Winter PD, Osmond C, *et al.* Weight in infancy and death from ischaemic heart disease. *Lancet* 1989;**2**:577–80.
